# Supplementary material
Source: PubMed Central journal article supplement (PMC3100984)
Supplement: 1105168108_pnas.201105168SI.pdf [file 1105168108_pnas.201105168SI.pdf]

# Supporting Information

Sims and Kim 10.1073/pnas.1105168108

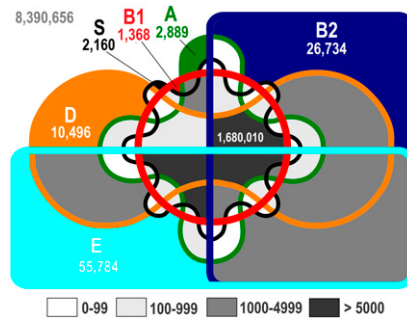

**Fig. S1.** Distinguishing *Escherichia coli/Shigella* phylogroup features. An Edwards' Venn diagram depicting the numbers of features present in all possible combinations of phylogroup intersections. The colored regions represent the characteristic features of each phylogroup. Distinguishing features are those features that are present in a single phylogroup but absent from all others. Other regions colored in grayscale represent groups of features that are shared by two or more phylogroups. Note the features used are universally present in all members of the phylogroups in each described region. The union of all sets contains 8,224,172 features, and the universal set contains 8,390,656.

**Table S1. Feature counts**

| Phylogroup set                               | Feature count | Phylogroup set                              | Feature count | Phylogroup set                              | Feature count |
|----------------------------------------------|---------------|---------------------------------------------|---------------|---------------------------------------------|---------------|
| $V = A \cup B1 \cup B2 \cup D \cup E \cup S$ | 8,224,172     | $V'$                                        | 166,484       | $U = \text{Universal set}$                  | 8,390,656     |
| $A$                                          | 2,727,759     | $B1$                                        | 2,848,252     | $B2$                                        | 2,691,012     |
| $D$                                          | 2,742,919     | $E$                                         | 3,505,791     | $S$                                         | 2,153,098     |
| $A \cap (B1 \cup B2 \cup D \cup E \cup S)'$  | 2,889         | $A \cap B1 \cap B2 \cap (D \cup E \cup S)'$ | 42            | $A \cap B1 \cap B2 \cap E \cap (D \cup S)'$ | 27            |
| $B1 \cap (A \cup B2 \cup D \cup E \cup S)'$  | 1,368         | $A \cap B1 \cap D \cap (B2 \cup E \cup S)'$ | 107           | $A \cap B1 \cap B2 \cap S \cap (D \cup E)'$ | 360           |
| $B2 \cap (A \cup B1 \cup D \cup E \cup S)'$  | 26,734        | $A \cap B1 \cap E \cap (B2 \cup D \cup S)'$ | 353           | $A \cap B1 \cap D \cap E \cap (B2 \cup S)'$ | 237           |
| $D \cap (A \cup B1 \cup B2 \cup E \cup S)'$  | 10,496        | $A \cap B1 \cap S \cap (B2 \cup D \cup E)'$ | 1,025         | $A \cap B1 \cap D \cap S \cap (B2 \cup E)'$ | 840           |
| $E \cap (A \cup B1 \cup B2 \cup D \cup S)'$  | 55,784        | $A \cap B2 \cap D \cap (B1 \cup E \cup S)'$ | 420           | $A \cap B1 \cap E \cap S \cap (B2 \cup D)'$ | 5,819         |
| $S \cap (A \cup B1 \cup B2 \cup D \cup E)'$  | 2,160         | $A \cap B2 \cap E \cap (B1 \cup D \cup S)'$ | 47            | $A \cap B2 \cap D \cap E \cap (B1 \cup S)'$ | 191           |
| $A \cap B1 \cap (B2 \cup D \cup E \cup S)'$  | 1,179         | $A \cap B2 \cap S \cap (B1 \cup D \cup E)'$ | 0             | $A \cap B2 \cap D \cap S \cap (B1 \cup E)'$ | 25            |
| $A \cap B2 \cap (B1 \cup D \cup E \cup S)'$  | 255           | $A \cap D \cap E \cap (B1 \cup B2 \cup S)'$ | 67            | $A \cap B2 \cap E \cap S \cap (B1 \cup D)'$ | 8             |
| $A \cap D \cap (B1 \cup B2 \cup E \cup S)'$  | 114           | $A \cap D \cap S \cap (B1 \cup B2 \cup E)'$ | 0             | $A \cap D \cap E \cap S \cap (B1 \cup B2)'$ | 19            |
| $A \cap E \cap (B1 \cup B2 \cup D \cup S)'$  | 348           | $A \cap E \cap S \cap (B1 \cup B2 \cup D)'$ | 80            | $B1 \cap B2 \cap D \cap E \cap (A \cup S)'$ | 98            |
| $A \cap S \cap (B1 \cup B2 \cup D \cup E)'$  | 20            | $B1 \cap B2 \cap D \cap (A \cup E \cup S)'$ | 120           | $B1 \cap B2 \cap D \cap S \cap (A \cup E)'$ | 234           |
| $B1 \cap B2 \cap (A \cup D \cup E \cup S)'$  | 430           | $B1 \cap B2 \cap E \cap (A \cup D \cup S)'$ | 36            | $B1 \cap B2 \cap E \cap S \cap (A \cup D)'$ | 64            |
| $B1 \cap D \cap (A \cup B2 \cup E \cup S)'$  | 58            | $B1 \cap B2 \cap S \cap (A \cup D \cup E)'$ | 21            | $B1 \cap D \cap E \cap S \cap (A \cup B2)'$ | 134           |
| $B1 \cap E \cap (A \cup B2 \cup D \cup S)'$  | 159           | $B1 \cap D \cap E \cap (A \cup B2 \cup S)'$ | 13            | $B2 \cap D \cap E \cap S \cap (A \cup B1)'$ | 143           |
| $B1 \cap S \cap (A \cup B2 \cup D \cup E)'$  | 149           | $B1 \cap D \cap S \cap (A \cup B2 \cup E)'$ | 9             | $A \cap B1 \cap B2 \cap D \cap E \cap (S)'$ | 3,458         |
| $B2 \cap D \cap (A \cup B1 \cup E \cup S)'$  | 7,091         | $B1 \cap E \cap S \cap (A \cup B2 \cup D)'$ | 377           | $A \cap B1 \cap B2 \cap D \cap S \cap (E)'$ | 15,391        |
| $B2 \cap E \cap (A \cup B1 \cup D \cup S)'$  | 1,414         | $B2 \cap D \cap E \cap (A \cup B1 \cup S)'$ | 1,689         | $A \cap B1 \cap B2 \cap E \cap S \cap (D)'$ | 4,592         |
| $B2 \cap S \cap (A \cup B1 \cup D \cup E)'$  | 33            | $B2 \cap D \cap S \cap (A \cup B1 \cup E)'$ | 102           | $A \cap B2 \cap D \cap E \cap S \cap (B1)'$ | 529           |
| $D \cap E \cap (A \cup B1 \cup B2 \cup S)'$  | 3,088         | $B2 \cap E \cap S \cap (A \cup B1 \cup D)'$ | 15            | $A \cap B1 \cap E \cap D \cap S \cap (B2)'$ | 21,714        |
| $D \cap S \cap (A \cup B1 \cup B2 \cup E)'$  | 22            | $D \cap E \cap S \cap (A \cup B1 \cup B2)'$ | 28            | $B1 \cap B2 \cap D \cap E \cap S \cap (A)'$ | 2,630         |
| $E \cap S \cap (A \cup B1 \cup B2 \cup D)'$  | 150           | $A \cap B1 \cap B2 \cap D \cap (E \cup S)'$ | 259           | $A \cap B1 \cap B2 \cap D \cap E \cap S$    | 1,680,010     |

$\cap$  is the intersection,  $\cup$  is the union, and  $'$  represents the complement.  $V'$  therefore indicates all features that are not present in any phylogroup, and  $A \cap (B1 \cup B2 \cup D \cup E \cup S)'$  indicates all features that are present in all phylogroup A species but absent in all other phylogroups.

**Table S2. Phylogroup distinguishing features (*I* = 24) and associated genes**

| Group                                                                          | Gene                                                                        | Hits                                      |     |
|--------------------------------------------------------------------------------|-----------------------------------------------------------------------------|-------------------------------------------|-----|
| <b>S</b>                                                                       | <i>ipaH</i> , invasion plasmid antigen                                      | 15,636                                    |     |
|                                                                                | Phage tail fiber protein/phage integrase/misc phage component               | 5,846+                                    |     |
|                                                                                | Insertion sequence/transposase                                              | 3,674+                                    |     |
|                                                                                | <i>SitB</i>                                                                 | 231                                       |     |
|                                                                                | <i>SitD</i>                                                                 | 175                                       |     |
|                                                                                | tRNA-Arg phage associated (SF4456)                                          | 165                                       |     |
|                                                                                | <i>SitA</i>                                                                 | 112                                       |     |
|                                                                                | <i>SitC</i>                                                                 | 63                                        |     |
|                                                                                | <b>B1</b>                                                                   | <i>mvpA</i> , plasmid maintenance protein | 590 |
|                                                                                |                                                                             | <i>speF</i> , ornithine decarboxylase     | 301 |
| Transcriptional regulation protein (ECE24377A_2756)                            |                                                                             | 259                                       |     |
| <i>YehB</i> , putative outer membrane usher protein precursor (ECE24377A_1244) |                                                                             | 175                                       |     |
| <i>asnB</i> , asparagine synthetase                                            |                                                                             | 161                                       |     |
| <i>hopD</i> , leader peptidase (ECE24377A_3806)                                |                                                                             | 154                                       |     |
| <i>mvpT</i> , postsegregational killing toxin (ECE24377A_2756)                 |                                                                             | 132                                       |     |
| <i>eprK</i> , type III secretion system lipoprotein precursor                  |                                                                             | 114                                       |     |
| <i>yidJ</i> , sulfatase (ECE24377A_4186)                                       |                                                                             | 105                                       |     |
| <i>ygiZ</i> , conserved inner membrane protein                                 |                                                                             | 80                                        |     |
| <b>D</b>                                                                       | Invasion/intimin protein (EcoSMS35_4024)                                    | 2,532                                     |     |
|                                                                                | <i>ydbA</i> , autotransported OMP involved in cell adhesion (EcoSMS35_1767) | 802                                       |     |
|                                                                                | <i>lpfC</i> , long polar fimbrial usher operon protein                      | 789                                       |     |
|                                                                                | <i>lpfD</i> , long polar fimbrial usher operon protein                      | 660                                       |     |
|                                                                                | Invasion protein regulator (EcoSMS35_4023)                                  | 906                                       |     |
|                                                                                | <i>sipB</i> , type III cell invasion protein                                | 743                                       |     |
|                                                                                | <i>sipD</i> , type III effector protein                                     | 752                                       |     |
|                                                                                | Chromosome segregation protein (EcoSMS35_4086)                              | 686                                       |     |
|                                                                                | Unknown function (EcoSMS35_4035)                                            | 613                                       |     |
|                                                                                | Exported protein (EcoSMS35_4687)                                            | 552                                       |     |

## Other Supporting Information Files

[Dataset S1 \(TXT\)](#)

[Dataset S2 \(TXT\)](#)
